# Supplementary material
Source: PubMed Central journal article supplement (PMC9171684)
Supplement: EMBR-23-e54275-s008.pdf [file EMBR-23-e54275-s008.pdf]

**Appendix for: Transforming primary human hepatocytes to hepatocellular carcinoma with genetically defined factors.**

**Table of content (TOC)**

|                    |   |
|--------------------|---|
| Appendix Figure S1 | 2 |
| Appendix Figure S2 | 3 |
| Appendix Figure S3 | 4 |
| Appendix Table S1  | 5 |
| Appendix Table S2  | 6 |
| Appendix Table S3  | 7 |
| Appendix Table S4  | 8 |

## Appendix Figure S1

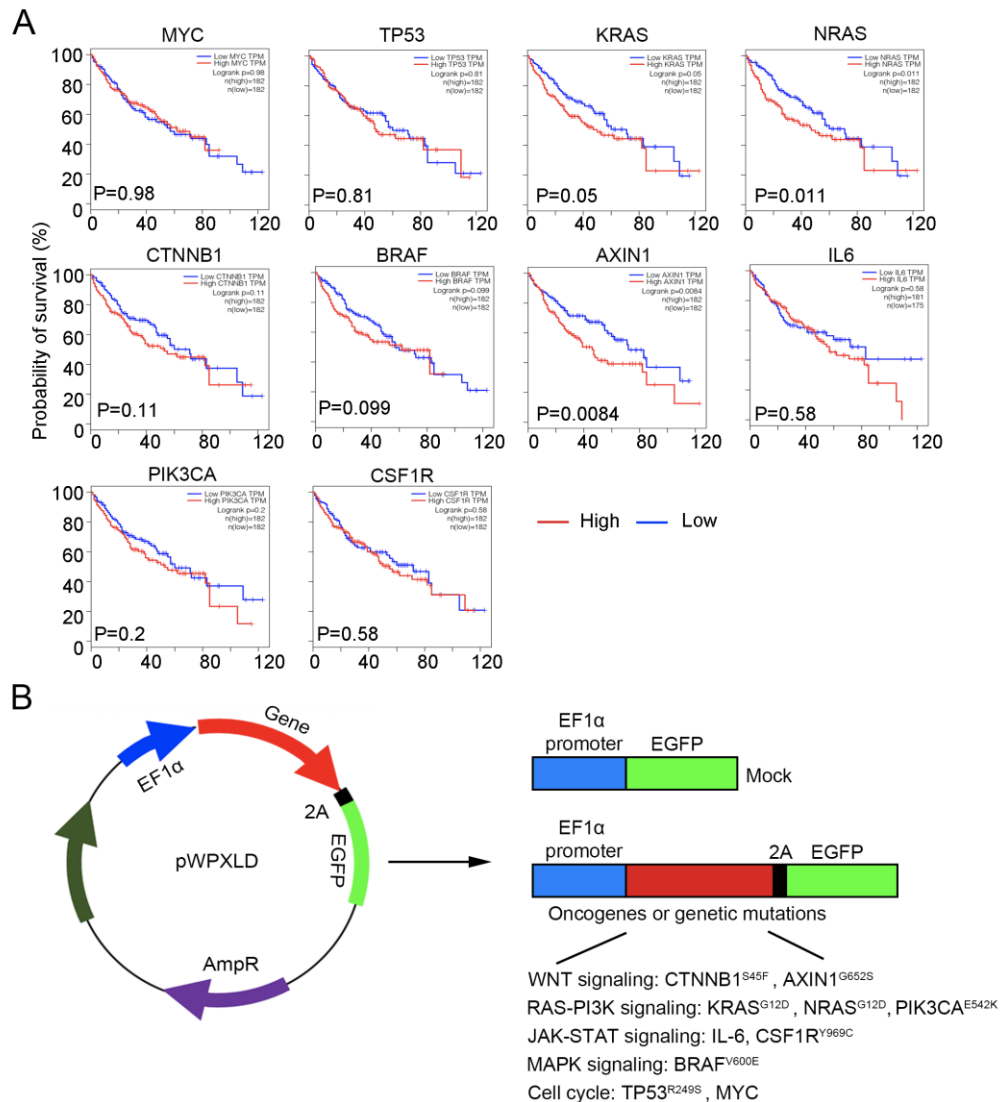

**Appendix Figure S1. Ten oncogenic genes and its association with HCC prognosis.** (A) Kaplan-Meier analysis of TCGA-LIHC cohorts based on the expression levels of the indicated genes in the cohort samples ( $n = 364$ , high expression in red, low expression in black, the number of patients were indicated in figures, Statistical significance was determined using a log-rank test.); (B) The pWPXLD vector was used for overexpression of the 10 selected oncogenic candidates (OC) individually. Candidates and EGFP, separated by 2A, were driven by a EF1 $\alpha$  promoter. These OC are associated with the WNT, PI3K, JAK-STAT, MAPK, and cell cycle signaling pathways. The mock vector does not contain any candidate genes but EGFP.

## Appendix Figure S2

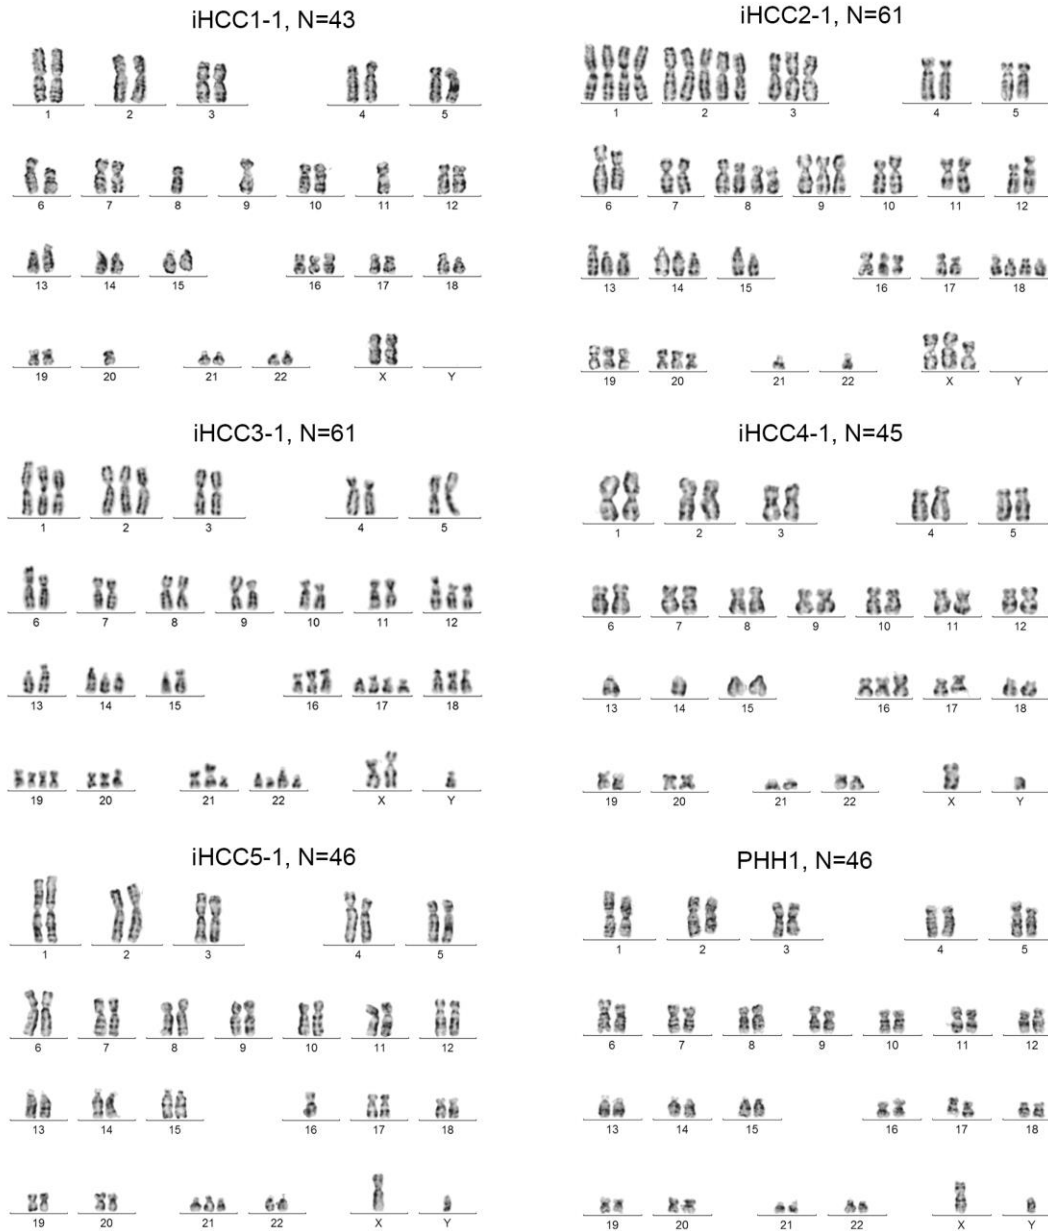

**Appendix Figure S2. Karyotype analysis of iHCC.** Representative images of iHCC cell chromosomes in metaphase used for ploidy analysis. iHCC1-1, iHCC2-1, iHCC3-1, iHCC4-1, and iHCC5-1 were derived from tumors in NSIF mice that were transplanted MTK-transduced PHHs and were cultured for 2-3 passages before karyotype analysis. Un-transduced PHHs from PHH1 were used as normal controls.

## Appendix Figure S3

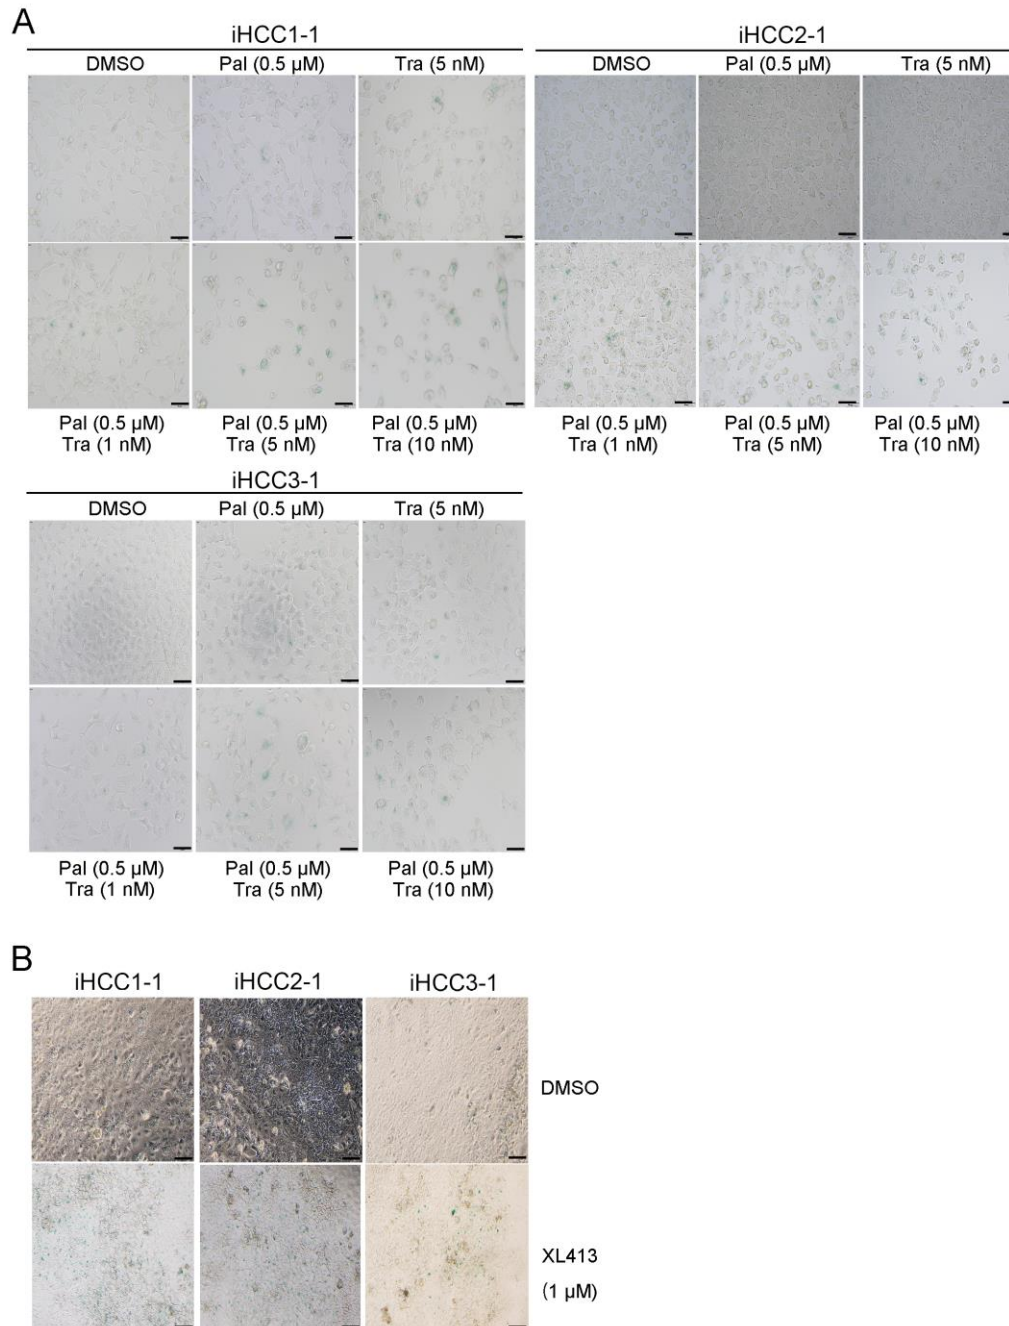

**Appendix Figure S3. Trametinib, Palbociclib, and XL413 treatment induced senescence in iHCC.** (A, B) SA- $\beta$ -Gal staining of iHCC cells from iHCC1-1, iHCC2-1, and iHCC3-1 treated with a MEK inhibitor (trametinib) and/or a CDK4/6 inhibitor (palbociclib) (A) and cell division cycle 7 homolog (CDC7) kinase inhibitor (XL413) (B). The data shown are representative of three biological replicates. Scale bars, 50  $\mu$ m.

**Appendix Table S1. Information of ALB levels, repopulation rates and survival duration of PHH-transplanted NSIF mice.**

| PHH-transplanted<br>NSIF mice No. | ALB<br>( $\mu\text{g/ml}$ ) | Repopulation <sup>1</sup> (%) | Survival duration<br>(Days) |
|-----------------------------------|-----------------------------|-------------------------------|-----------------------------|
| 1                                 | 1.84                        | 6.32                          | 28                          |
| 2                                 | 0.66                        | 7.21                          | 30                          |
| 3                                 | 2.04                        | 9.63                          | 32                          |
| 4                                 | 1.2                         | 5.51                          | 35                          |
| 5                                 | 1.21                        | 10.33                         | 38                          |
| 6                                 | 110.26                      | 27.64                         | 54                          |
| 7                                 | 83.24                       | 24.22                         | 62                          |
| 8                                 | 416.28                      | 20.55                         | 66                          |
| 9                                 | 165.23                      | 15.68                         | 66                          |
| 10                                | 61.78                       | 20.32                         | 72                          |
| 11                                | 650.24                      | 35.20                         | 80                          |
| 12                                | 1330.24                     | 46.20                         | 85                          |
| 13                                | 1614.15                     | 36.02                         | 90                          |
| 14                                | 2124.38                     | 44.77                         | 93                          |
| 15                                | 1205.23                     | 57.17                         | 104                         |

Repopulation<sup>1</sup>: Quantification of the repopulation efficiency was calculated based on the percentages of hALB-positive staining cells in reconstituted livers at indicated time points post transplantation with ImageJ software.

**Appendix Table S2. Screening oncogenes contributing to the transformation of PHHs into HCC.**

| Hepatocytes <sup>1</sup>        | PHH1 (AKB) |                 | PHH4 (HVN) |      | PHH5 (QBU) |      | In total |
|---------------------------------|------------|-----------------|------------|------|------------|------|----------|
| Oncogenes                       | Mock       | OC <sup>2</sup> | Mock       | OC   | Mock       | OC   |          |
| Transduction rates (%)          | 98.7       | 99.6            | 97.1       | 97.4 | 99.3       | 98.5 | 98.4     |
| Tumorigenesis rate <sup>3</sup> | 0/3        | 5/18            | 0/3        | 1/6  | 0/3        | 2/6  | 8/30     |
| <i>MYC</i> <sup>4</sup>         | 0/3        | 5/5             | 0/3        | 1/1  | 0/3        | 2/2  | 8/8      |
| <i>TP53</i> <sup>R249S</sup>    | 0/3        | 5/5             | 0/3        | 1/1  | 0/3        | 2/2  | 8/8      |
| <i>KRAS</i> <sup>G12D</sup>     | 0/3        | 5/5             | 0/3        | 1/1  | 0/3        | 1/2  | 7/8      |
| <i>NRAS</i> <sup>G12D</sup>     | 0/3        | 0/5             | 0/3        | 0/1  | 0/3        | 0/2  | 0/8      |
| <i>CTNNB1</i> <sup>S45F</sup>   | 0/3        | 0/5             | 0/3        | 0/1  | 0/3        | 0/2  | 0/8      |
| <i>BRAF</i> <sup>V600E</sup>    | 0/3        | 0/5             | 0/3        | 0/1  | 0/3        | 0/2  | 0/8      |
| <i>AXIN1</i> <sup>G652S</sup>   | 0/3        | 0/5             | 0/3        | 0/1  | 0/3        | 0/2  | 0/8      |
| <i>IL6</i>                      | 0/3        | 0/5             | 0/3        | 0/1  | 0/3        | 0/2  | 0/8      |
| <i>PIK3CA</i> <sup>E542K</sup>  | 0/3        | 0/5             | 0/3        | 0/1  | 0/3        | 0/2  | 0/8      |
| <i>CSF1R</i> <sup>Y969C</sup>   | 0/3        | 0/5             | 0/3        | 0/1  | 0/3        | 0/2  | 0/8      |

Hepatocytes<sup>1</sup>: PHHs from three donors, including PHH1 (AKB, female, 39 years old), PHH4 (HVN, male, 33 years old), and PHH5 (QBU, male, 50 years old), were purchased from Bioreclamation IVT (Baltimore, MD, USA) and were used in the experiment.

OC<sup>2</sup>: A cocktail of lentivirus containing oncogenic candidates (*MYC*, *TP53*<sup>R249S</sup>, *KRAS*<sup>G12D</sup>, *NRAS*<sup>G12D</sup>, *CTNNB1*<sup>S45F</sup>, *BRAF*<sup>V600E</sup>, *AXIN1*<sup>G652S</sup>, *IL6*, *PIK3CA*<sup>E542K</sup>, and *CSF1R*<sup>Y969C</sup>) were transduced into PHHs from different donors.

Tumorigenesis rate<sup>3</sup>: The ratios of mice that developed iHCC in the OC-PHHs transplanted group. For example, 5 out of 18 NSIF mice in the OC-PHHs group in which PHHs were derived from the PHH1 donor were observed bearing tumours in livers. In contrast, none of nine mice in the mock-PHHs group in which PHHs were from the three donors developed iHCC.

*MYC*<sup>4</sup>: The ratios of mice, in which tumours contained the indicated oncogenic candidate, in all tumour bearing mice. For example, all tumour samples from these 5 mice contained the lentiviral transduced MYC detected by PCR, within the 5 mice bearing iHCC in the OC-PHHs group (Donor: PHH1). In contrast, only one mouse whose tumour sample contained the lentiviral transduced KRAS<sup>G12D</sup> in the two iHCC-bearing mice (Donor: PHH5).

**Appendix Table S3. Information of iHCC samples from *MYC*, *TP53*<sup>R249S</sup>, and *KRAS*<sup>G12D</sup> transduced PHHs.**

| iHCC <sup>1</sup> | Donor | Lot No. | Gender of donor | Age of donor | OC <sup>2</sup> | Survival <sup>3</sup> (Months) |
|-------------------|-------|---------|-----------------|--------------|-----------------|--------------------------------|
| iHCC1-1           | PHH1  | AKB     | Female          | 39           | MTK             | 4                              |
| iHCC1-2           |       |         |                 |              |                 | 4                              |
| iHCC1-3           |       |         |                 |              |                 | 4.5                            |
| iHCC1-4           |       |         |                 |              |                 | 4.5                            |
| iHCC1-5           |       |         |                 |              |                 | 6                              |
| iHCC1-6           |       |         |                 |              |                 | 8                              |
| iHCC1-7           |       |         |                 |              | MT              | 8                              |
| iHCC2-1           | PHH2  | XSM     | Female          | 59           | MTK             | 3                              |
| iHCC2-2           |       |         |                 |              |                 | 3                              |
| iHCC2-3           |       |         |                 |              |                 | 3                              |
| iHCC2-4           |       |         |                 |              |                 | 4                              |
| iHCC2-5           |       |         |                 |              | MT              | 6                              |
| iHCC3-1           | PHH3  | ANG     | Male            | 0.3          | MTK             | 3.5                            |
| iHCC3-2           |       |         |                 |              |                 | 4                              |
| iHCC3-3           |       |         |                 |              |                 | 5                              |
| iHCC3-4           |       |         |                 |              |                 | 5                              |
| iHCC4-1           | PHH4  | HVN     | Male            | 33           | MTK             | 3.5                            |
| iHCC5-1           | PHH5  | QBU     | Male            | 50           | MTK             | 6                              |

Hepatocytes<sup>1</sup>: PHHs from three donors, including PHH1 (AKB, female, 39 years old), PHH2 (XSM, female, 59 years old), PHH3 (ANG, male, 3 months old), PHH4 (HVN, male, 33 years old), and PHH5 (QBU, male, 50 years old), were purchased from Bioreclamation IVT (Baltimore, MD, USA) and were used in the experiment.

OC<sup>2</sup>: A cocktail of lentivirus containing different combinations of oncogenic candidates (M for *MYC*, T for *TP53*<sup>R249S</sup>, and K for *KRAS*<sup>G12D</sup>) were transduced into PHHs from different donors.

Survival<sup>3</sup>: The length of survival of NSIF mice post transplantation of PHHs that were transduced with different combinations of oncogenic candidates. Mice were euthanized for further analysis after showing severe weight loss and fatigue.

**Appendix Table S4. Primers and sgRNAs were used in this study.**

| Genes                          | Forward primer<br>(5' - 3') | Reverse primer<br>(5' - 3') | Amplicon<br>(bp) |
|--------------------------------|-----------------------------|-----------------------------|------------------|
| <i>MYC</i>                     | CAGGCTCCTGGCAAAGGTCA        | ACGTCGCCGTCCAGCTCGAC        | 684              |
| <i>TP53</i> <sup>R249S</sup>   | CCTATGAGCCGCCTGAGGTT        | ACGTCGCCGTCCAGCTCGAC        | 685              |
| <i>KRAS</i> <sup>G12D</sup>    | ATGACTGAATATAAACTTGT        | ACGTCGCCGTCCAGCTCGAC        | 725              |
| <i>NRAS</i> <sup>G12D</sup>    | ATGACTGAGTACAACTGGT         | ACGTCGCCGTCCAGCTCGAC        | 728              |
| <i>CTNNB1</i> <sup>S45F</sup>  | TGCTTTATTCTCCCATTGAA        | ACGTCGCCGTCCAGCTCGAC        | 700              |
| <i>BRAF</i> <sup>V600E</sup>   | TCACAGTAAAAATAGGTGAT        | ACGTCGCCGTCCAGCTCGAC        | 697              |
| <i>AXINI</i> <sup>G652S</sup>  | CTTCATCCAAGACCCACCAT        | ACGTCGCCGTCCAGCTCGAC        | 684              |
| <i>IL6</i>                     | ATTCAAAGATGTAGCCGCC         | ACGTCGCCGTCCAGCTCGAC        | 694              |
| <i>PIK3CA</i> <sup>E542K</sup> | TATATGATGCAGCCATTGAC        | ACGTCGCCGTCCAGCTCGAC        | 700              |
| <i>CSF1R</i> <sup>Y969C</sup>  | ACTTCGGGCTGGCTAGGGAC        | ACGTCGCCGTCCAGCTCGAC        | 691              |
| <i>Fah</i>                     | ATAGCTTGTGAGCATTGATT        | CAGGCAGCCAGACAGCCAAG        | 430              |
| <i>ALB</i>                     | GAGACCAGAGGTTGATGTGATG      | CTTTGGCAACAGGCAGGCAG        | 196              |
| <i>AAT</i>                     | ATGCTGCCCAGAAGACAGATA       | AGAGCATTGCAAAGGCTGTA        | 177              |
| <i>TAT</i>                     | TGCCGGGAAAAATGAAAGGC        | CAGGGTCTGTAGGCAGGTTTC       | 186              |
| <i>ARG1</i>                    | GTGGAAACTTGCATGGACAAC       | TCAAATGTAGTGTTCCTCCAGG      | 162              |
| <i>CYP1A2</i>                  | CTGGGCACTTCGACCCTTAC        | AGGTAGCGAAGGATGGGGAAG       | 187              |
| <i>CYP2B6</i>                  | GCACTCCTCACAGGACTCTTG       | CCCAGGTGTACCGTGAAGAC        | 185              |



|                               |                          |                           |     |
|-------------------------------|--------------------------|---------------------------|-----|
| <i>Total-TP53</i>             | GAGGTTGGCTCTGACTGTACC    | CGGAGATTCTCTTCCTCTGTGC    | 200 |
| <i>Mutant TP53</i>            | ACTCAAGGATGCCCAGGCTGG    | TGGACCTGGATTGCTTTCTACATCC | 220 |
| <i>WT TP53</i>                | ACTCAAGGATGCCCAGGCTGG    | AAGGGTTCAAAGACCCAAAACCC   | 224 |
| <i>MYC</i>                    | AAGAGGACTTGTTGCGGAAACGA  | GCTTTCTACATCCCCAGCCAG     | 146 |
| <i>TP53<sup>R249S</sup></i>   | AAGGGTCAGTCTACCTCCCG     | GCTTTCTACATCCCCAGCCAG     | 128 |
| <i>KRAS<sup>G12D</sup></i>    | CAGCAAAGACAAGACAGGGTG    | GCTTTCTACATCCCCAGCCAG     | 196 |
| <i>NRAS<sup>G12D</sup></i>    | CCAAGACCAGACAGGGTGTTGA   | GCTTTCTACATCCCCAGCCAG     | 196 |
| <i>CTNNB1<sup>S45F</sup></i>  | CACCACCCTGGTGCTGACT      | GCTTTCTACATCCCCAGCCAG     | 185 |
| <i>BRAF<sup>V600E</sup></i>   | ATTCACCGCAGTGCATCAGAA    | GCTTTCTACATCCCCAGCCAG     | 194 |
| <i>AXINI<sup>G652S</sup></i>  | GTTTGAGGAGGTTTCGAGAGGACG | GCTTTCTACATCCCCAGCCAG     | 144 |
| <i>IL6</i>                    | CCTGCTGACGAAGCTGCAG      | GCTTTCTACATCCCCAGCCAG     | 180 |
| <i>PIK3CA<sup>E542K</sup></i> | ATGATGCACATCATGGTGGCT    | GCTTTCTACATCCCCAGCCAG     | 139 |
| <i>CSF1R<sup>Y969C</sup></i>  | CTGGAGGAGGAGAGCTCTAGTG   | GCTTTCTACATCCCCAGCCAG     | 158 |
| <i>GFP</i>                    | CTGGCTGGGGATGTAGAAAGC    | TTGTGGCCGTTTACGTTCGC      | 119 |
| <i>sgTP53</i>                 | CAGTGACCCGGAAGGCAGTC     |                           | 20  |
