# Supplementary material
Source: PubMed Central journal article supplement (PMC9171684)
Supplement: EMBR-23-e54275-s009.pdf [file EMBR-23-e54275-s009.pdf]

## Expanded View Figures

### Figure EV1. iHCC derived from PHHs by oncogenic candidate transduction.

- A Commercial cryopreserved PHHs (PHH1, PHH4, and PHH5) were seeded in 6-well plates and immunoassayed with antibodies that recognize ALB and KRT19. Scale bars, 20  $\mu\text{m}$ .
- B Representative FACS analysis of PHHs that were transduced with a cocktail of 10 OC lentiviruses (right) or mock lentivirus (left).
- C qPCR assays measuring the transduction efficiencies of individual oncogenes using the genomic DNA samples of OC-transduced PHHs. Relative copy numbers of DNA of oncogenes to the DNA of GFP. Data are presented as the mean  $\pm$  SD ( $n = 3$ ). *N*-numbers refer to biological replicates.
- D The levels of albumin secretion in PHHs and OC-transduced PHHs were measured by ELISA ( $n = 3$ ),  $P = 0.0378$  with unpaired *t*-test,  $*P \leq 0.05$ . Data are presented as the mean  $\pm$  SD. *N*-numbers refer to biological replicates.
- E The levels of APOA1 secretion in PHHs and OC-transduced PHHs were measured by ELISA ( $n = 3$ ),  $P > 0.05$  with unpaired *t*-test, data are presented as the mean  $\pm$  SD, N.S. indicates non-statistical significance. *N*-numbers refer to biological replicates.
- F Glycogen storage was quantified by colorimetric in PHHs and OC-transduced PHHs ( $n = 3$ ),  $P > 0.05$  with unpaired *t*-test, data are presented as the mean  $\pm$  SD. N.S. indicates non-statistical significance. *N*-numbers refer to biological replicates.
- G qPCR results of expression levels of hepatic genes in PHHs, OC-transduced PHHs, and HepG2 cells on day 2 post-transduction in culture ( $n = 3$ ), data are presented as the mean  $\pm$  SD. *N*-numbers refer to biological replicates.
- H The expression levels of endogenous (WT) and mutant (Mut) TP53 in OC-transduced PHHs ( $n = 5$ ,  $P < 0.0001$  with one-way ANOVA by Tukey's multiple comparison test),  $***P \leq 0.001$ , data are presented as the mean  $\pm$  SD. *N*-numbers refer to biological replicates.
- I Mice with advanced intrahepatic tumor exhibited swollen and ascites-containing abdomens, allowing detection of tumor burden by palpation. Tumors were pointed with white arrows.
- J–L Primary iHCC samples were harvested from mice from the OC group and were transplanted.  $1 \times 10^6$  iHCC cells were subjected for serial transplantations into NSI mice subcutaneously or splenically. Tumors were reconstituted post-three rounds of subcutaneous transplantations of iHCC (J); Bright-field and EGFP imaging of an explanted liver from a tumor-bearing NSI mouse post splenic injection of iHCC cells. Scale bars, 0.5 cm (K); The anti-GFP immunofluorescence and H&E staining of tumor dissection from a tumor-bearing NSI mouse post splenic transplantation of iHCC. Scale bars, 20  $\mu\text{m}$  (L).

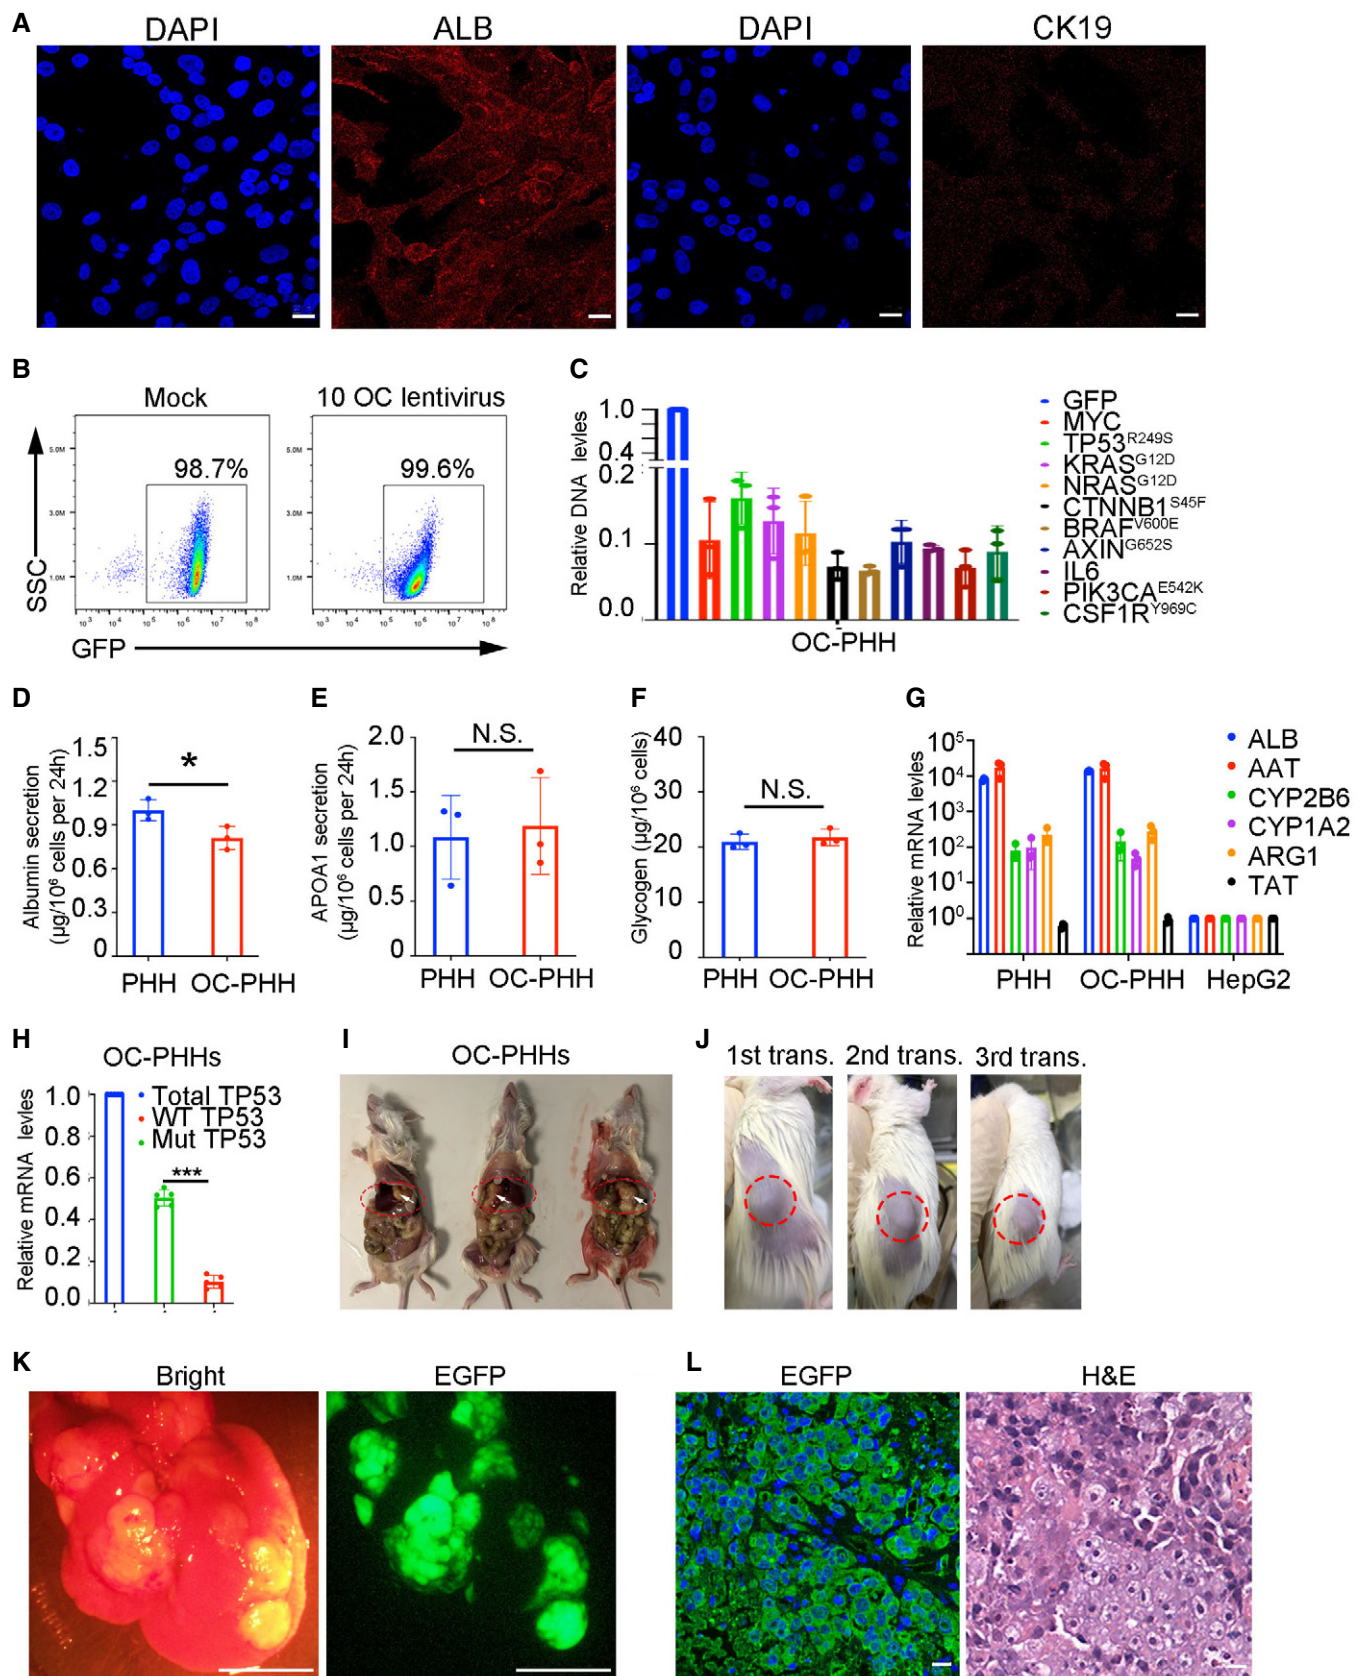

Figure EV1.

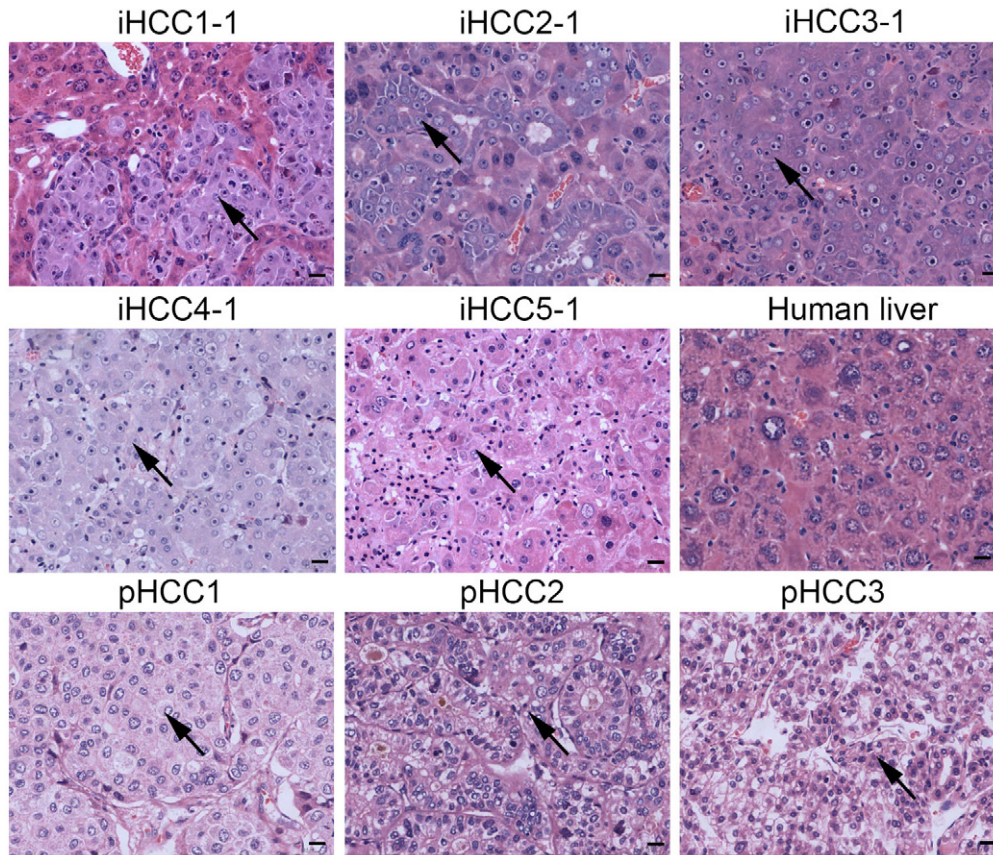

#### Figure EV2. Morphologic characteristics of iHCC.

Representative H&E-stained sections of iHCC tissues (iHCC1-5) from tumor-bearing mice transplanted with PHHs from 5 different donors (PHH1-5) transduced with the combination of *MYC*, *TP53*<sup>R249S</sup>, and *KRAS*<sup>G12D</sup> overexpression lentiviruses, normal human liver tissue (Human liver), and primary HCC tissues from three different patients (pHCC1-3). Tumor cells are pointed with black arrows. Scale bar, 20  $\mu$ m.

#### Figure EV3. iHCC samples express HCC markers.

- A Representative IHC images of four iHCC samples (iHCC1-1, iHCC2-1, iHCC3-1, and iHCC4-1) from NSIF mice transplanted with MTK-transduced PHHs from four different PHH donors (PHH1-4) and an HCC tissue from a patient (pHCC2). Anti-HLA-ABC, anti-ALB, anti-AFP, anti-GPC3 and anti-KRT19 antibodies were used. Scale bars, 20  $\mu$ m.
- B DNA sequencing confirmed mutations of TP53 in the genomic DNA of sgTP53 transduced PHH cells.
- C Expression of p53 was detected in the PHH cells transduced with sgMock or sgTP53 by Western blotting.
- D Representative images of in situ liver carcinomas derived from PHHs transduced with a combination of MTK with or without deletion of TP53 in NSIF mice. 3 out of 4 mice harbored tumor in both MTK+ sgMock and MTK+ sgTP53 groups after 11 weeks ( $n = 4$  per group). *N*-numbers refer to biological replicates.
- E Representative IHC images Ki67 staining of liver sections from NSIF mice transplanted with PHHs that were transduced with the combinations of *MYC/TP53*<sup>R249S</sup>/*KRAS*<sup>G12D</sup> (MTK) or *MYC/TP53*<sup>R249S</sup> (MT) lentiviruses. Scale bars, 20  $\mu$ m.

Source data are available online for this figure.

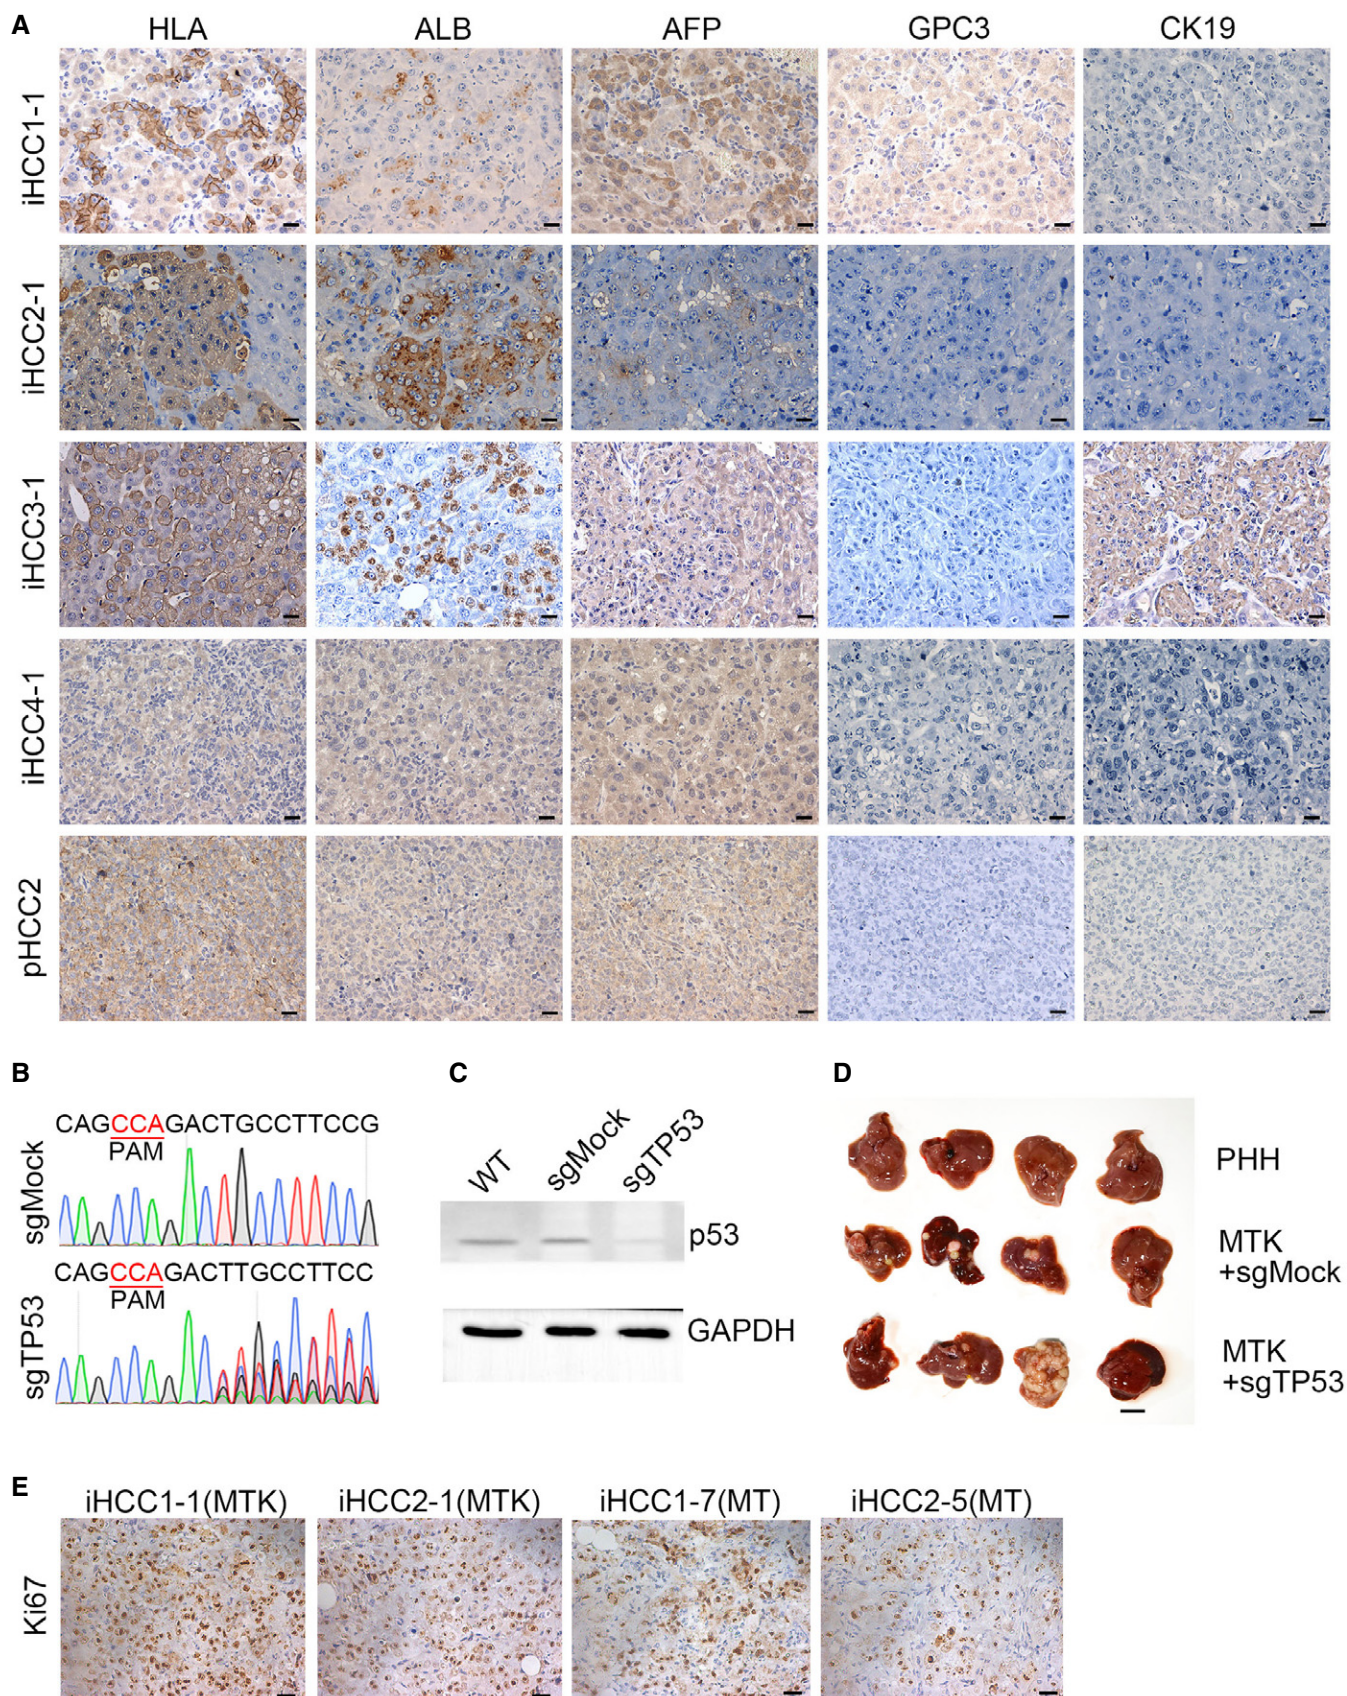

Figure EV3.

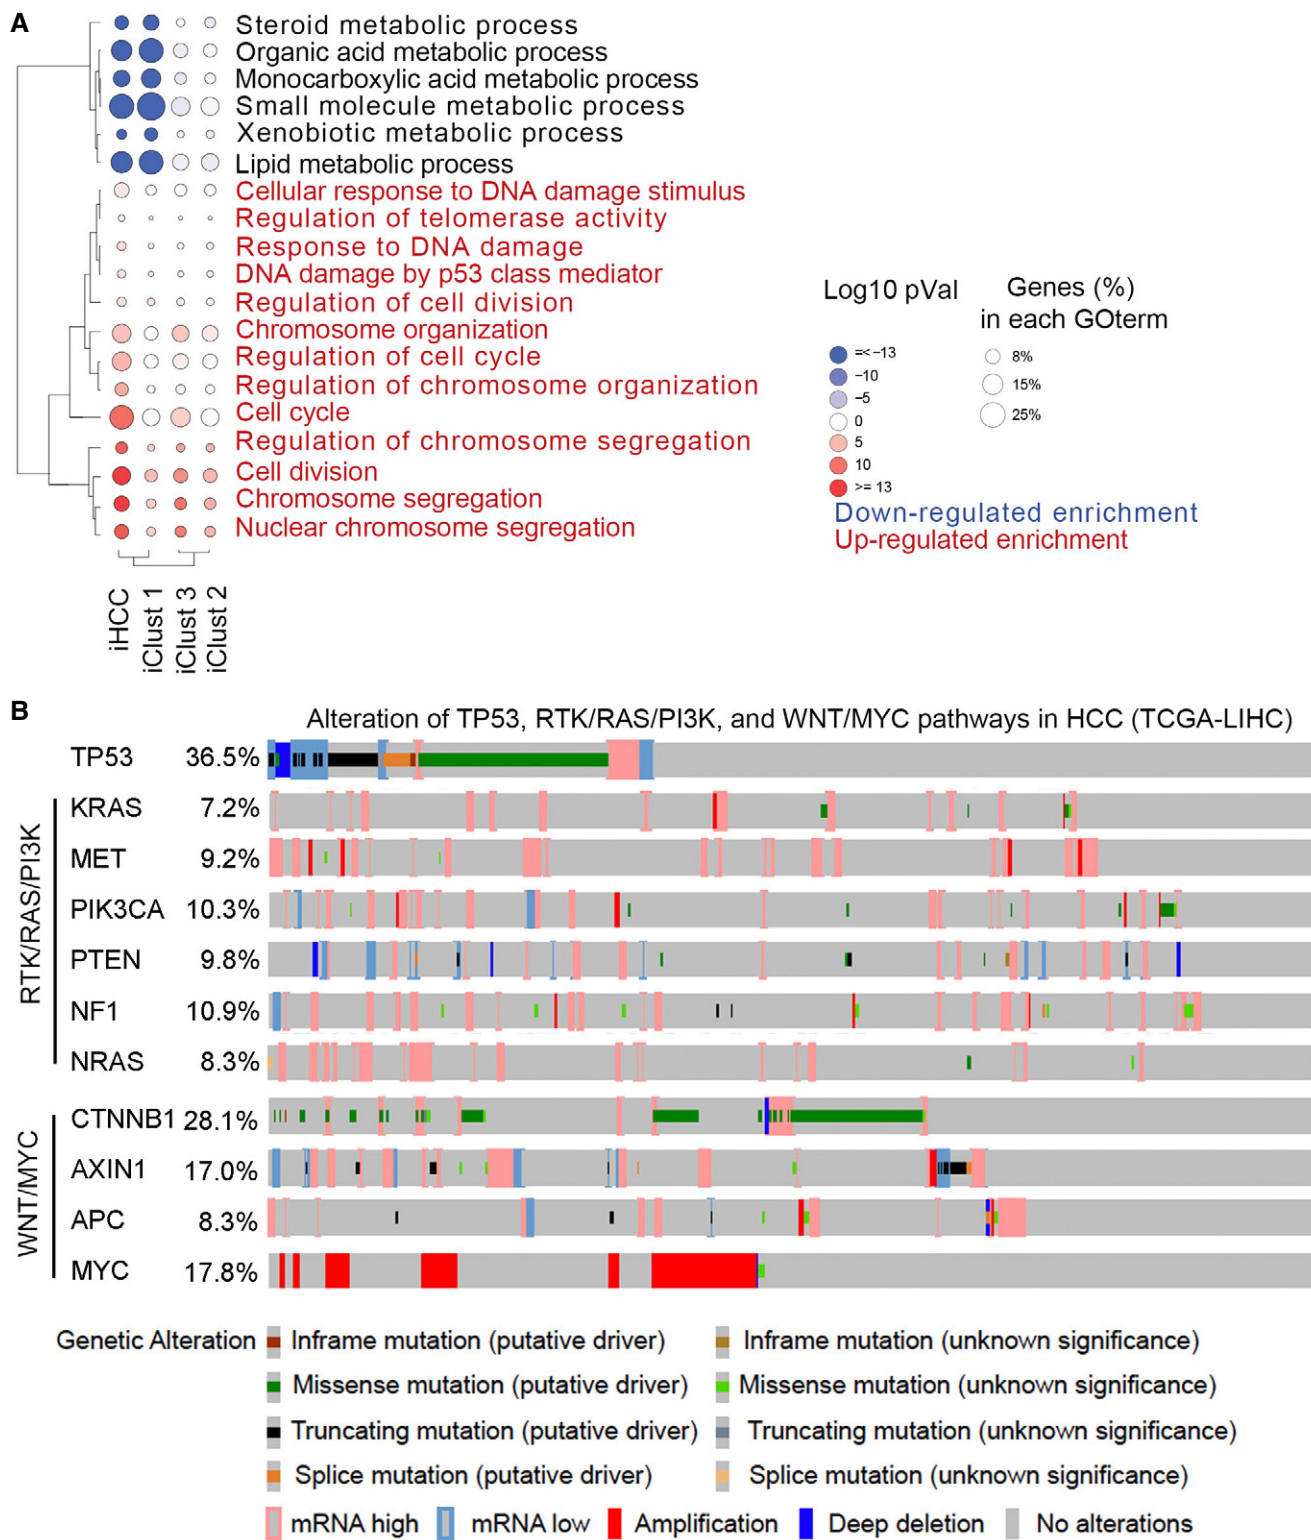

**Figure EV4. Mutational signatures in liver hepatocellular carcinoma(TCGA-LIHC).**

A Gene ontology (GO) analysis of the pathways enriched with DEGs (fold change  $\geq 2$  and  $P$  value  $\leq 0.05$ ) in iHCC cells and clinical patient HCC (iClust 1, iClust 2 and iClust 3).

B Alteration signatures of TP53 mutations, and mutations in the RTK/RAS/PI3K and WNT/MYC pathways in clinical HCC samples obtained from the TCGA-LIHC database.

**Figure EV5. Cell surface markers associated with poor prognosis and the design of CAR molecules.**

- A Kaplan-Meier analysis of the TCGA-HCC (TCGA-LIHC) cohorts based on the expression levels of *SLC34A2*, *FBN2*, *FOLR1*, and *SLC39A10* in the cohort samples ( $n = 364$ , high expression in red, low expression in black, the number of patients were indicated in figures, Statistical significance was determined using a log-rank test).
- B, C Representative IHC staining of FAP and MUC1 in a normal liver (PHH), primary HCC (pHCC) and five MTK-transduced iHCC tissues (iHCC1-1, iHCC2-1, iHCC3-1, iHCC4-1, and iHCC5-1) that were derived from five different donors (PHH1-5). Scale bars, 20  $\mu\text{m}$ .
- D Design of the pWPXLD-CAR vector. pWPXLD-CAR contains an anti-FAP/MUC1 single-chain fragment variation (scFv), CD28 transmembrane and endodomain, TLR2 endodomain, CD3 $\zeta$  domain, and EGFP.
- E The transduction efficiency of pWPXLD-CAR is shown. Data are presented as the mean  $\pm$  SD.  $N$ -numbers refer to biological replicates.

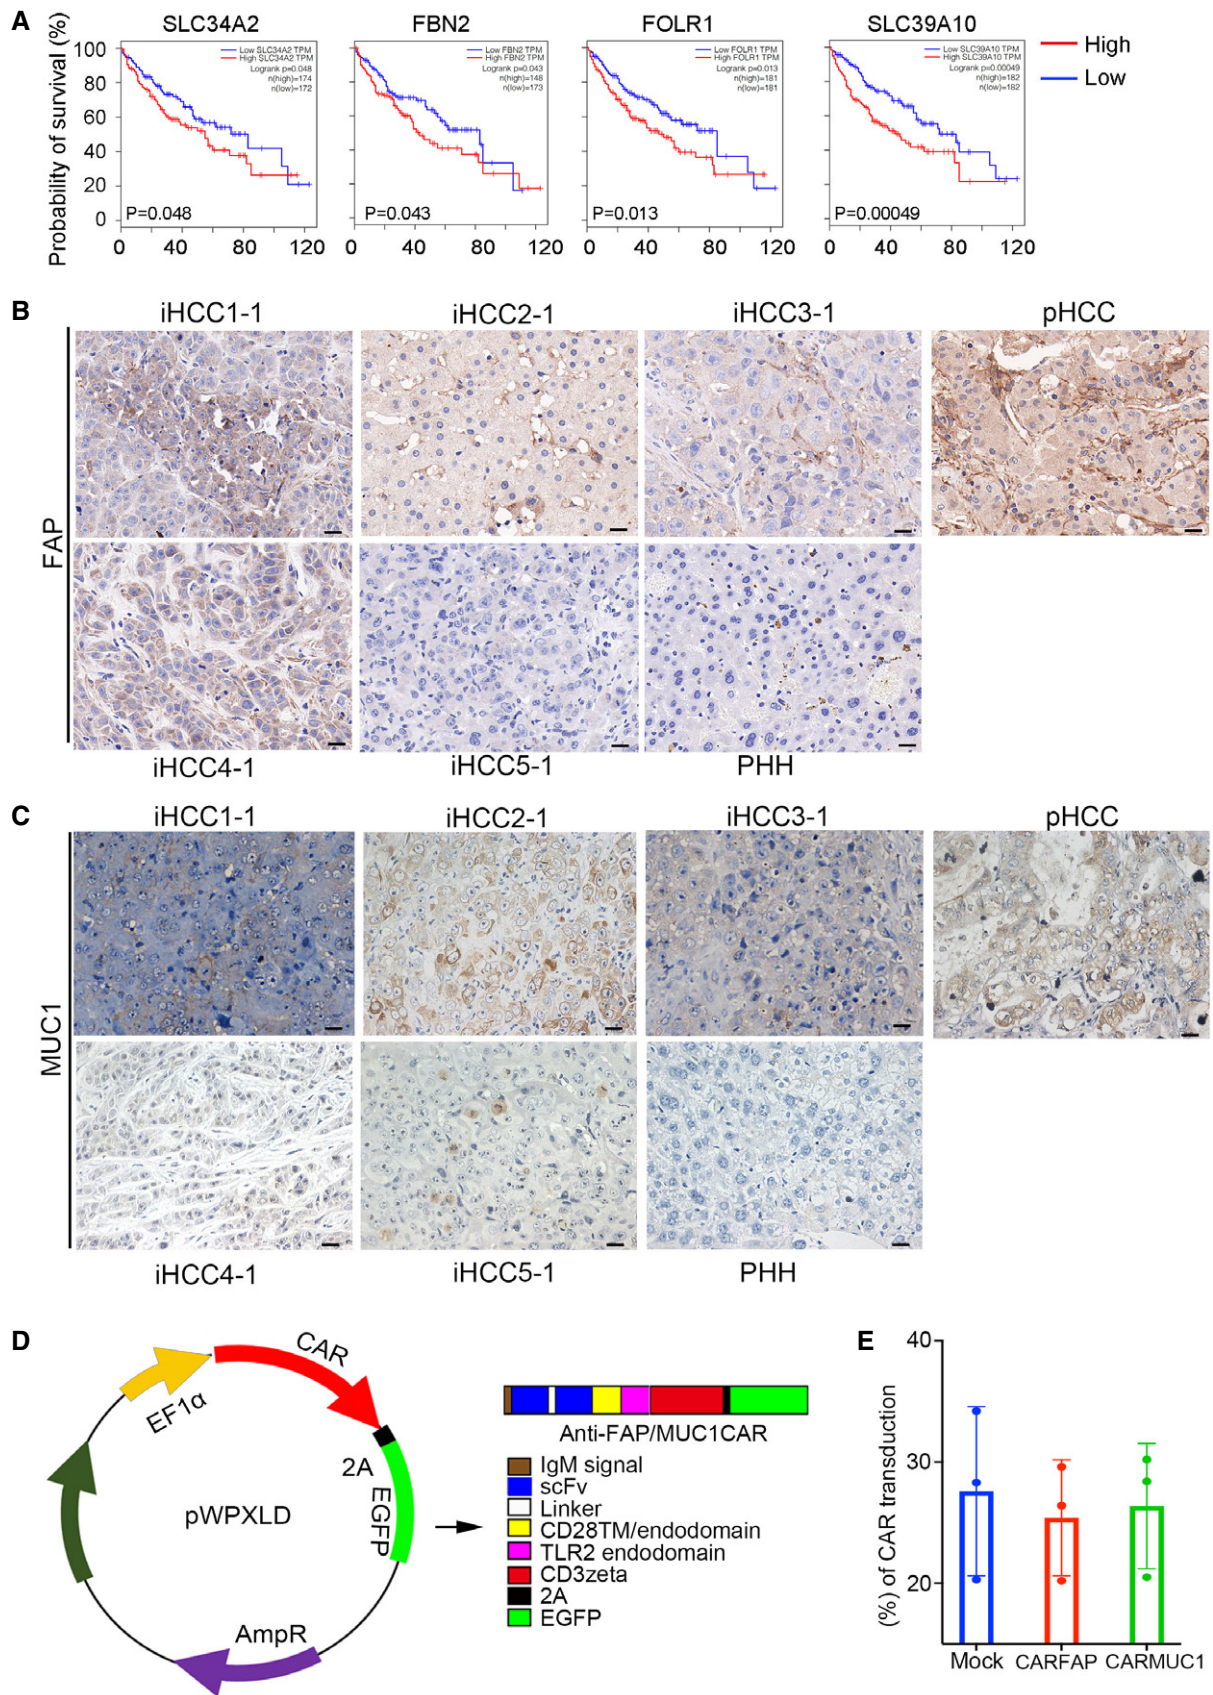

Figure EV5.
