# Supplementary material
Source: PubMed Central journal article supplement (PMC9171684)

Raw Western blots by Zhiwu Jiang et al.

Figure 1C

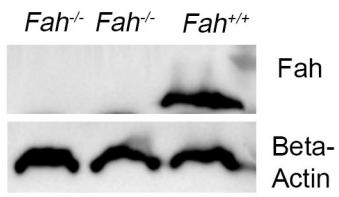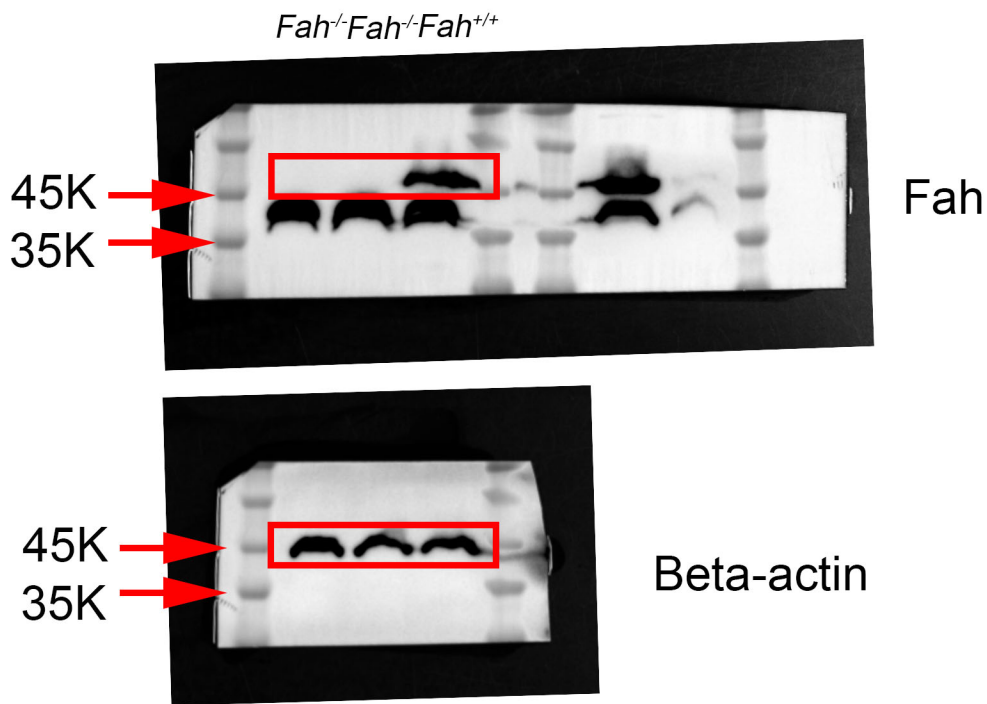

Supplement: EMBR-23-e54275-s001.pdf [file EMBR-23-e54275-s001.pdf]

Raw Western blots Zhiwu Jiang et al.

Figure 3I

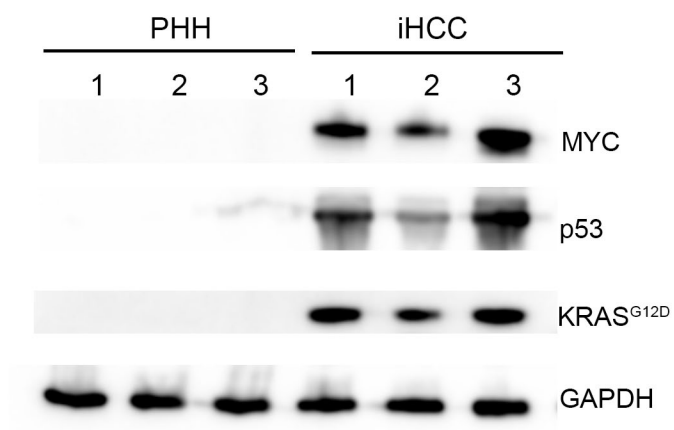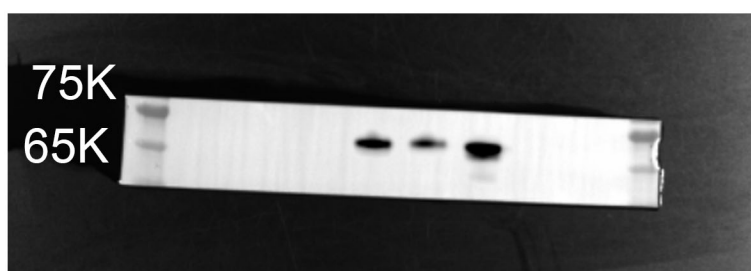

MYC

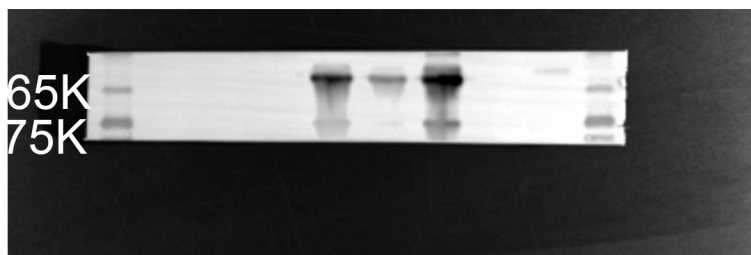

p53

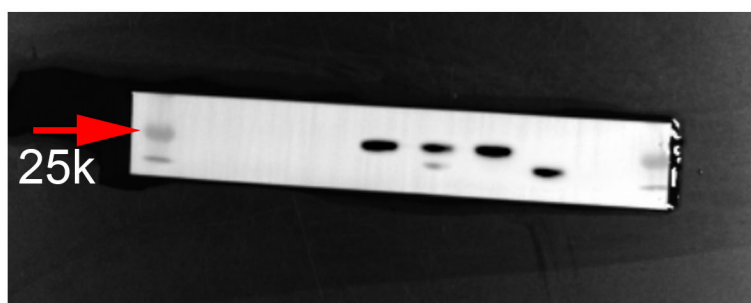

KRAS<sup>G12D</sup>

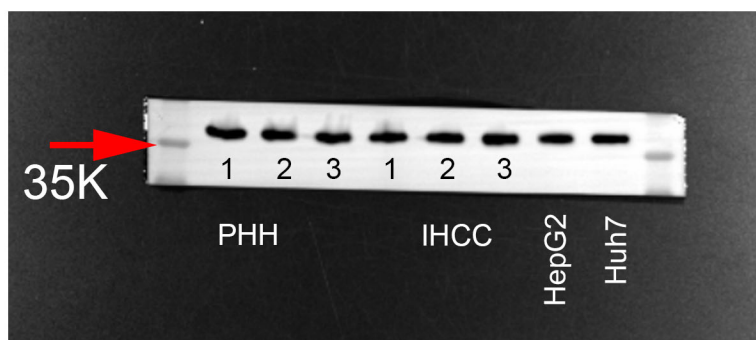

GAPDH

Supplement: EMBR-23-e54275-s005.pdf [file EMBR-23-e54275-s005.pdf]
